# Supplementary material
Source: publisher site journal article supplement (https://www.dovepress.com/article/565490)
Supplement: Supplementary file 1 [file 565490_Supplementary%20Material_SUBMIT%20v1.docx]

**Supplementary Figure 1. Excerpts from biologic patient decision aid.**

| **Panel A: Participants are asked to indicate which, if any, biologics have been recommended to them by their rheumatologist.** | **Panel C: Participants are invited to consider whether they feel they have enough knowledge and support to make a decision about taking a biologic.** |
| --- | --- |
| 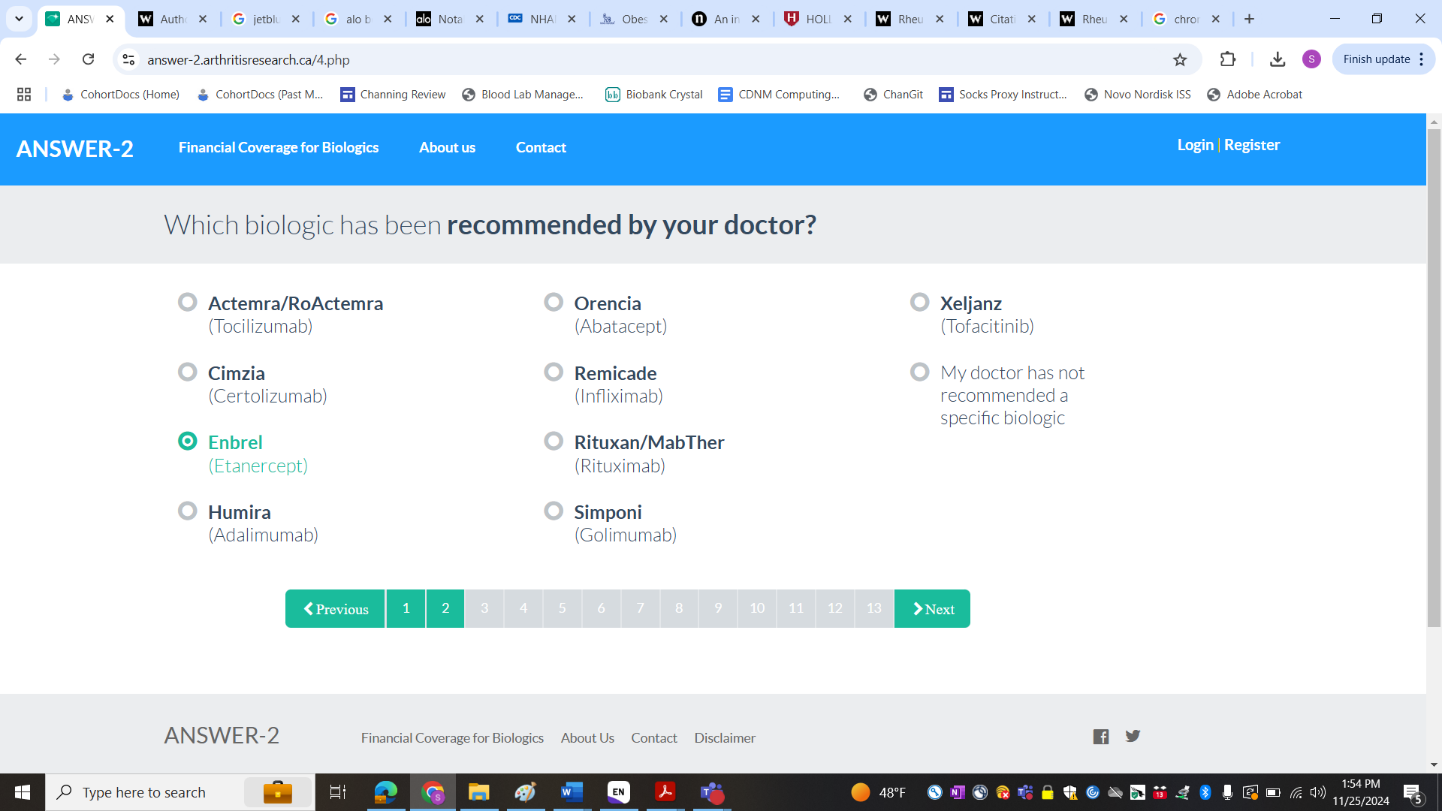 | **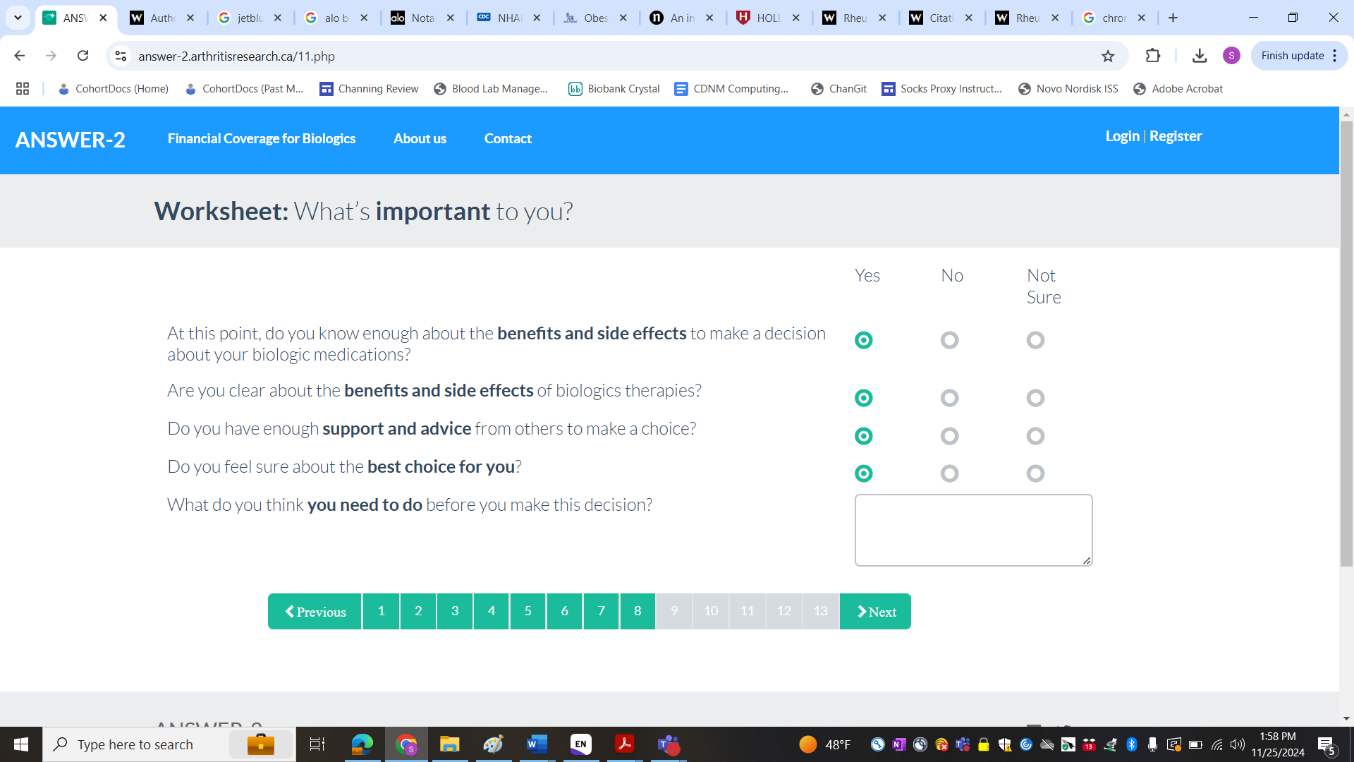** |
| **Panel B: Participants may compare how important the different features of biologic medications are to them. The decision aid summarizes the relative weight of each dimension in a pie chart.** | **Panel D: Participants are provided with recommendations based on their responses to the earlier exercises. The rheumatologist’s recommendation is also highlighted in the summary table for reference.** |
| **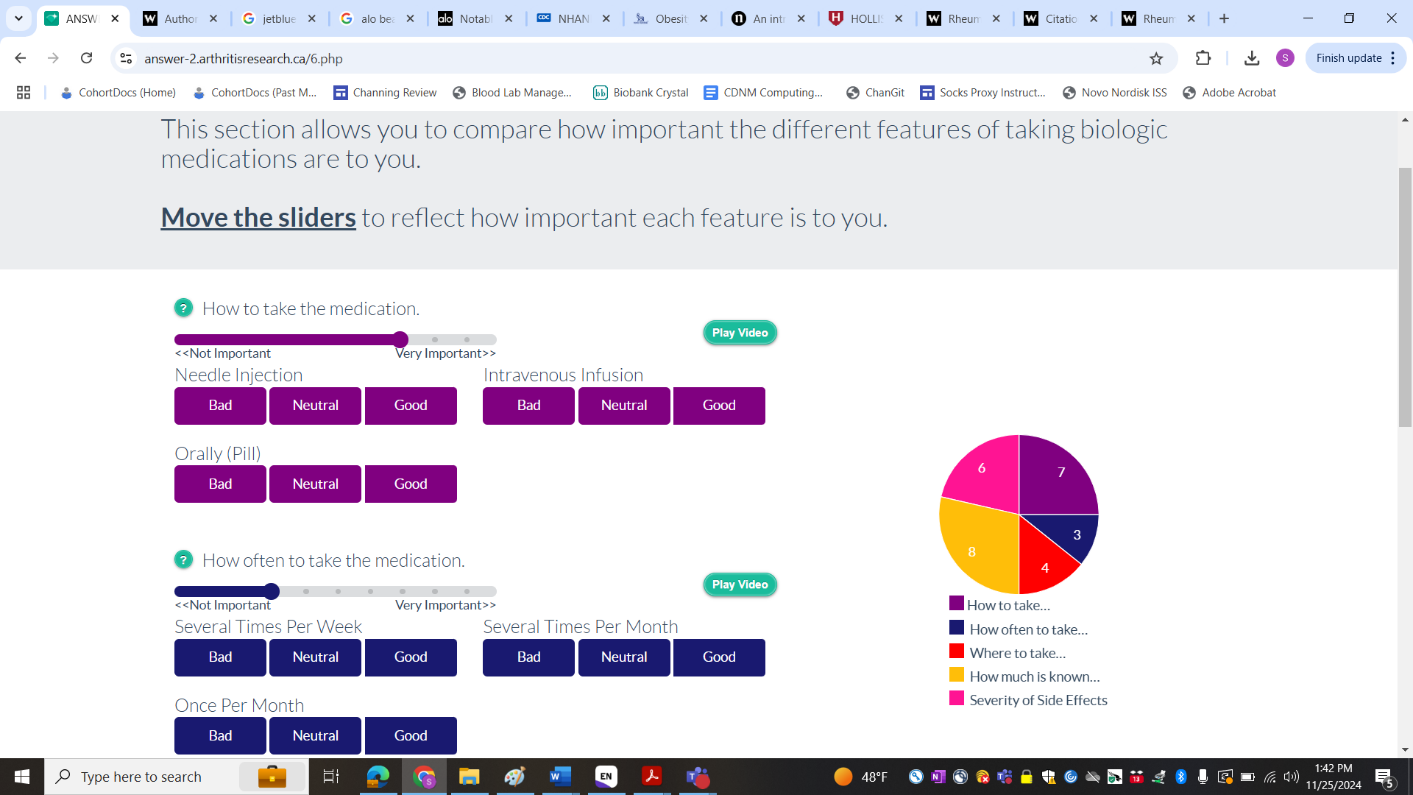** | **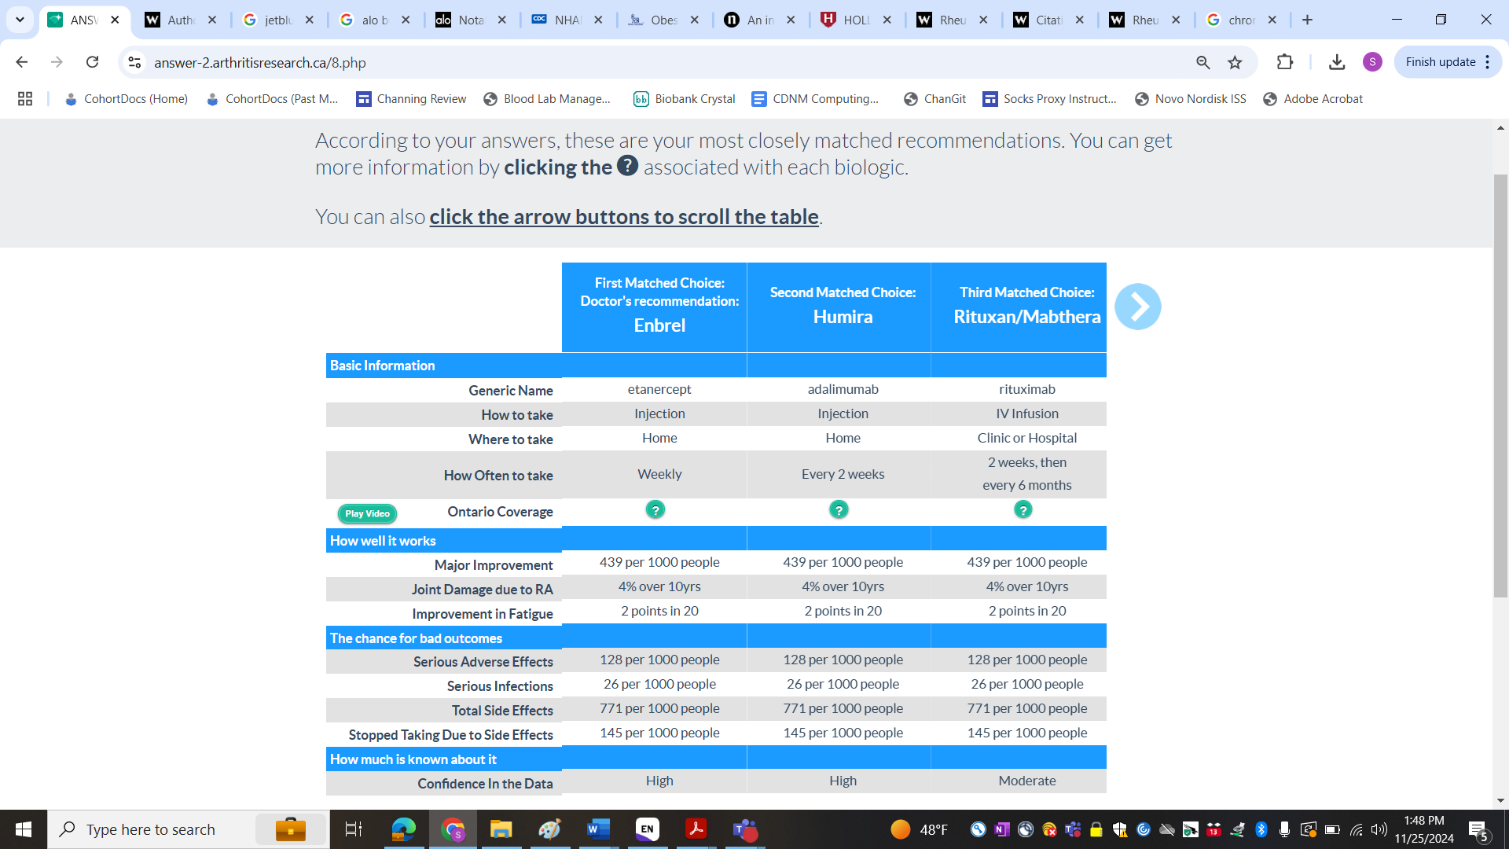** |
